# Supplementary material for: Highly selective sensing of Fe3+ by an anionic metal–organic framework containing uncoordinated nitrogen and carboxylate oxygen sites
Source: Royal Society of Chemistry journal article supplement (doi:10.1039/c8dt00088c), 2018-01-01

## checkCIF/PLATON report

Structure factors have been supplied for datablock(s) FJI-C8

THIS REPORT IS FOR GUIDANCE ONLY. IF USED AS PART OF A REVIEW PROCEDURE FOR PUBLICATION, IT SHOULD NOT REPLACE THE EXPERTISE OF AN EXPERIENCED CRYSTALLOGRAPHIC REFEREE.

No syntax errors found.      CIF dictionary      Interpreting this report

### Datablock: FJI-C8

---

Bond precision:    C-C = 0.0144 Å                      Wavelength=1.54184

Cell:                      a=45.0598(4)              b=45.0598(4)              c=45.0598(4)  
                            alpha=90                      beta=90                      gamma=90  
Temperature:              100 K

|                | Calculated           | Reported             |
|----------------|----------------------|----------------------|
| Volume         | 91489(2)             | 91489(2)             |
| Space group    | F 41 3 2             | F 41 3 2             |
| Hall group     | F 4d 2 3             | F 4d 2 3             |
| Moiety formula | C108 H36 N24 O50 Zn9 | ?                    |
| Sum formula    | C108 H36 N24 O50 Zn9 | C108 H36 N24 O50 Zn9 |
| Mr             | 3058.12              | 3057.94              |
| Dx,g cm-3      | 0.888                | 0.888                |
| Z              | 16                   | 16                   |
| Mu (mm-1)      | 1.499                | 1.499                |
| F000           | 24352.0              | 24352.0              |
| F000'          | 24205.89             |                      |
| h,k,lmax       | 55,55,55             | 48,38,54             |
| Nref           | 7684[ 4423]          | 6866                 |
| Tmin,Tmax      | 0.861,0.861          |                      |
| Tmin'          | 0.861                |                      |

Correction method= Not given

Data completeness= 1.55/0.89                      Theta(max)= 73.202

R(reflections)= 0.0845( 2653)                      wR2(reflections)= 0.2972( 6866)

S = 0.900                                      Npar= 288

---

The following ALERTS were generated. Each ALERT has the format  
**test-name\_ALERT\_alert-type\_alert-level.**  
Click on the hyperlinks for more details of the test.

---

### 🔴 Alert level B

|                   |                                             |                    |    |    |    |    |      |        |
|-------------------|---------------------------------------------|--------------------|----|----|----|----|------|--------|
| PLAT369_ALERT_2_B | Long                                        | C(sp2)-C(sp2) Bond | C4 | -  | C9 | .. | 1.60 | Ang.   |
| PLAT430_ALERT_2_B | Short Inter D...                            | A Contact          | O8 | .. | O9 | .. | 2.77 | Ang.   |
| PLAT990_ALERT_1_B | Deprecated RES file style based SQUEEZE job | ....               |    |    |    |    |      | ! Note |

### 🟡 Alert level C

RFACR01\_ALERT\_3\_C The value of the weighted R factor is > 0.25  
Weighted R factor given 0.297

|                   |                                                  |                                           |     |   |     |    |         |             |
|-------------------|--------------------------------------------------|-------------------------------------------|-----|---|-----|----|---------|-------------|
| PLAT052_ALERT_1_C | Info on Absorption Correction Method             | Not Given                                 |     |   |     |    |         | Please Do ! |
| PLAT084_ALERT_3_C | High wR2 Value (i.e. > 0.25)                     | .....                                     |     |   |     |    | 0.30    | Report      |
| PLAT241_ALERT_2_C | High                                             | 'MainMol' Ueq as Compared to Neighbors of |     |   |     |    | O6      | Check       |
| PLAT241_ALERT_2_C | High                                             | 'MainMol' Ueq as Compared to Neighbors of |     |   |     |    | N1      | Check       |
| PLAT241_ALERT_2_C | High                                             | 'MainMol' Ueq as Compared to Neighbors of |     |   |     |    | C5      | Check       |
| PLAT241_ALERT_2_C | High                                             | 'MainMol' Ueq as Compared to Neighbors of |     |   |     |    | C9      | Check       |
| PLAT242_ALERT_2_C | Low                                              | 'MainMol' Ueq as Compared to Neighbors of |     |   |     |    | C1      | Check       |
| PLAT242_ALERT_2_C | Low                                              | 'MainMol' Ueq as Compared to Neighbors of |     |   |     |    | C4      | Check       |
| PLAT242_ALERT_2_C | Low                                              | 'MainMol' Ueq as Compared to Neighbors of |     |   |     |    | C6      | Check       |
| PLAT242_ALERT_2_C | Low                                              | 'MainMol' Ueq as Compared to Neighbors of |     |   |     |    | C11     | Check       |
| PLAT242_ALERT_2_C | Low                                              | 'MainMol' Ueq as Compared to Neighbors of |     |   |     |    | C18     | Check       |
| PLAT334_ALERT_2_C | Small Average Benzene C-C Dist.                  | C2 -C7                                    |     |   |     |    | 1.35    | Ang.        |
| PLAT341_ALERT_3_C | Low Bond Precision on C-C Bonds                  | .....                                     |     |   |     |    | 0.01437 | Ang.        |
| PLAT369_ALERT_2_C | Long                                             | C(sp2)-C(sp2) Bond                        | C10 | - | C11 | .. | 1.54    | Ang.        |
| PLAT369_ALERT_2_C | Long                                             | C(sp2)-C(sp2) Bond                        | C15 | - | C18 | .. | 1.53    | Ang.        |
| PLAT906_ALERT_3_C | Large K value in the Analysis of Variance        | .....                                     |     |   |     |    | 10.345  | Check       |
| PLAT906_ALERT_3_C | Large K value in the Analysis of Variance        | .....                                     |     |   |     |    | 2.268   | Check       |
| PLAT906_ALERT_3_C | Large K value in the Analysis of Variance        | .....                                     |     |   |     |    | 3.584   | Check       |
| PLAT906_ALERT_3_C | Large K value in the Analysis of Variance        | .....                                     |     |   |     |    | 2.235   | Check       |
| PLAT906_ALERT_3_C | Large K value in the Analysis of Variance        | .....                                     |     |   |     |    | 2.368   | Check       |
| PLAT911_ALERT_3_C | Missing # FCF Refl Between THmin & STh/L=        | 0.600                                     |     |   |     |    | 243     | Report      |
| PLAT915_ALERT_3_C | No Flack x Check Done: Low Friedel Pair Coverage |                                           |     |   |     |    | 87      | %           |

### 🟢 Alert level G

|                   |                                                    |       |  |  |  |  |      |              |
|-------------------|----------------------------------------------------|-------|--|--|--|--|------|--------------|
| PLAT002_ALERT_2_G | Number of Distance or Angle Restraints on AtSite   |       |  |  |  |  | 24   | Note         |
| PLAT003_ALERT_2_G | Number of Uiso or Uij Restrained non-H Atoms ...   |       |  |  |  |  | 19   | Report       |
| PLAT004_ALERT_5_G | Polymeric Structure Found with Maximum Dimension   |       |  |  |  |  | 3    | Info         |
| PLAT072_ALERT_2_G | SHELXL First Parameter in WGHT Unusually Large     |       |  |  |  |  | 0.19 | Report       |
| PLAT174_ALERT_4_G | The CIF-Embedded .res File Contains FLAT Records   |       |  |  |  |  | 2    | Report       |
| PLAT176_ALERT_4_G | The CIF-Embedded .res File Contains SADI Records   |       |  |  |  |  | 6    | Report       |
| PLAT178_ALERT_4_G | The CIF-Embedded .res File Contains SIMU Records   |       |  |  |  |  | 4    | Report       |
| PLAT186_ALERT_4_G | The CIF-Embedded .res File Contains ISOR Records   |       |  |  |  |  | 1    | Report       |
| PLAT187_ALERT_4_G | The CIF-Embedded .res File Contains RIGU Records   |       |  |  |  |  | 2    | Report       |
| PLAT606_ALERT_4_G | VERY LARGE Solvent Accessible VOID(S) in Structure |       |  |  |  |  |      | ! Info       |
| PLAT764_ALERT_4_G | Overcomplete CIF Bond List Detected (Rep/Expd)     |       |  |  |  |  | 1.14 | Ratio        |
| PLAT802_ALERT_4_G | CIF Input Record(s) with more than 80 Characters   |       |  |  |  |  | 4    | Info         |
| PLAT860_ALERT_3_G | Number of Least-Squares Restraints                 | ..... |  |  |  |  | 289  | Note         |
| PLAT869_ALERT_4_G | ALERTS Related to the use of SQUEEZE Suppressed    |       |  |  |  |  |      | ! Info       |
| PLAT910_ALERT_3_G | Missing # of FCF Reflection(s) Below Theta(Min)    |       |  |  |  |  | 2    | Note         |
| PLAT912_ALERT_4_G | Missing # of FCF Reflections Above STh/L=          | 0.600 |  |  |  |  | 136  | Note         |
| PLAT950_ALERT_5_G | Calculated (ThMax) and CIF-Reported Hmax Differ    |       |  |  |  |  | 7    | Units        |
| PLAT951_ALERT_5_G | Calculated (ThMax) and CIF-Reported Kmax Differ    |       |  |  |  |  | 17   | Units        |
| PLAT961_ALERT_5_G | Dataset Contains no Negative Intensities           | ..... |  |  |  |  |      | Please Check |

- 0 **ALERT level A** = Most likely a serious problem - resolve or explain  
3 **ALERT level B** = A potentially serious problem, consider carefully  
23 **ALERT level C** = Check. Ensure it is not caused by an omission or oversight  
19 **ALERT level G** = General information/check it is not something unexpected

2 ALERT type 1 CIF construction/syntax error, inconsistent or missing data

17 ALERT type 2 Indicator that the structure model may be wrong or deficient  
 12 ALERT type 3 Indicator that the structure quality may be low  
 10 ALERT type 4 Improvement, methodology, query or suggestion  
 4 ALERT type 5 Informative message, check

---

## Validation response form

Please find below a validation response form (VRF) that can be filled in and pasted into your CIF.

```
# start Validation Reply Form
_vrf_RFACR01_FJI-C8
;
PROBLEM: The value of the weighted R factor is > 0.25
RESPONSE: ...
;
_vrf_PLAT052_FJI-C8
;
PROBLEM: Info on Absorption Correction Method    Not Given    Please Do !
RESPONSE: ...
;
_vrf_PLAT084_FJI-C8
;
PROBLEM: High wr2 Value (i.e. > 0.25) .....          0.30 Report
RESPONSE: ...
;
_vrf_PLAT241_FJI-C8
;
PROBLEM: High    'MainMol' Ueq as Compared to Neighbors of          06 Check
RESPONSE: ...
;
_vrf_PLAT242_FJI-C8
;
PROBLEM: Low     'MainMol' Ueq as Compared to Neighbors of          C1 Check
RESPONSE: ...
;
_vrf_PLAT334_FJI-C8
;
PROBLEM: Small Average Benzene  C-C Dist. C2      -C7          1.35 Ang.
RESPONSE: ...
;
_vrf_PLAT341_FJI-C8
;
PROBLEM: Low Bond Precision on  C-C Bonds .....          0.01437 Ang.
RESPONSE: ...
;
_vrf_PLAT369_FJI-C8
;
PROBLEM: Long     C(sp2)-C(sp2) Bond  C10      -   C11      ..          1.54 Ang.
RESPONSE: ...
;
_vrf_PLAT906_FJI-C8
;
PROBLEM: Large K value in the Analysis of Variance .....          10.345 Check
RESPONSE: ...
;
_vrf_PLAT911_FJI-C8
;
PROBLEM: Missing # FCF Refl Between THmin & STh/L=  0.600          243 Report
RESPONSE: ...
;
```

```
_vrf_PLAT915_FJI-C8
;
PROBLEM: No Flack x Check Done: Low Friedel Pair Coverage      87 %
RESPONSE: ...
;
# end Validation Reply Form
```

---

It is advisable to attempt to resolve as many as possible of the alerts in all categories. Often the minor alerts point to easily fixed oversights, errors and omissions in your CIF or refinement strategy, so attention to these fine details can be worthwhile. In order to resolve some of the more serious problems it may be necessary to carry out additional measurements or structure refinements. However, the purpose of your study may justify the reported deviations and the more serious of these should normally be commented upon in the discussion or experimental section of a paper or in the "special\_details" fields of the CIF. checkCIF was carefully designed to identify outliers and unusual parameters, but every test has its limitations and alerts that are not important in a particular case may appear. Conversely, the absence of alerts does not guarantee there are no aspects of the results needing attention. It is up to the individual to critically assess their own results and, if necessary, seek expert advice.

### **Publication of your CIF in IUCr journals**

A basic structural check has been run on your CIF. These basic checks will be run on all CIFs submitted for publication in IUCr journals (*Acta Crystallographica*, *Journal of Applied Crystallography*, *Journal of Synchrotron Radiation*); however, if you intend to submit to *Acta Crystallographica Section C* or *E* or *IUCrData*, you should make sure that full publication checks are run on the final version of your CIF prior to submission.

### **Publication of your CIF in other journals**

Please refer to the *Notes for Authors* of the relevant journal for any special instructions relating to CIF submission.

---

**PLATON version of 11/08/2016; check.def file version of 04/08/2016**

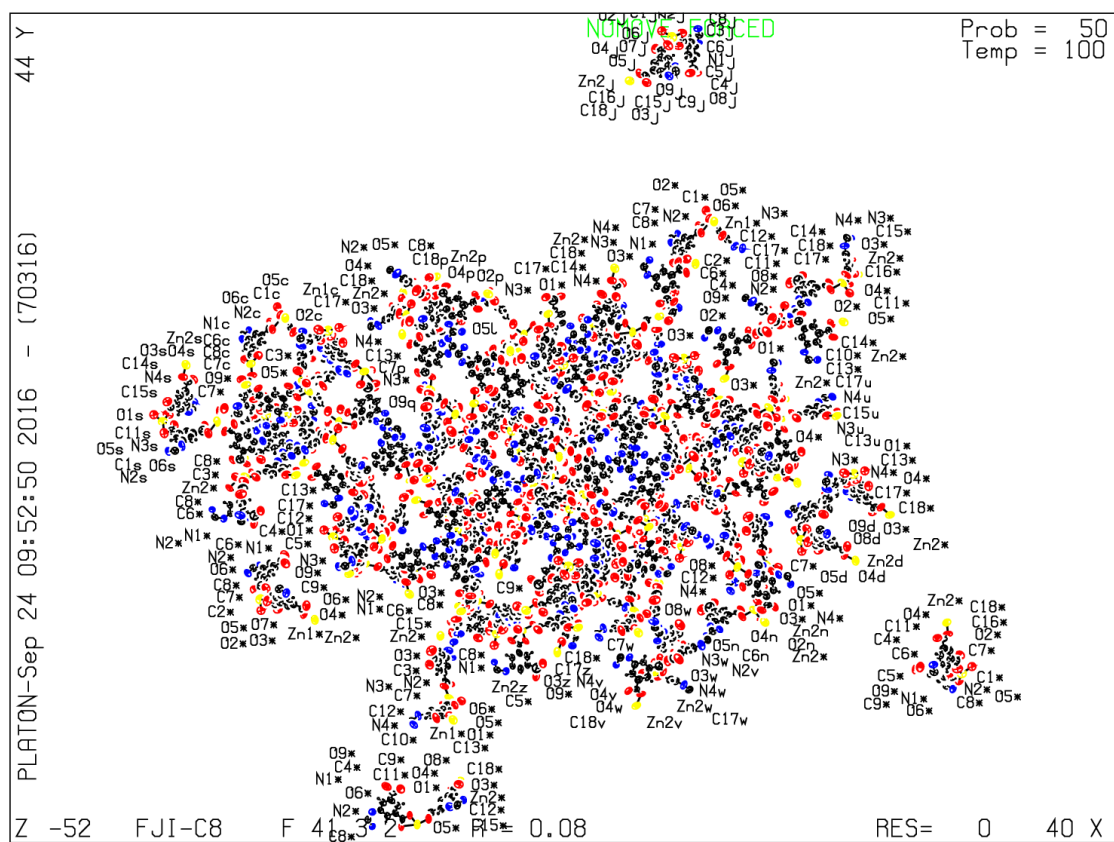

Supplement: c8dt00088c1.pdf [file c8dt00088c1.pdf]
